# Supplementary material
Source: PubMed Central journal article supplement (PMC1314744)
Supplement: 2003-469-s2.pdf [file 2003-469-s2.pdf]

## Supplementary information

Supplementary Table 1. Change\* in SF-36 and SF-6D scores at 3-month and 6-month follow-ups.

| SF-36                      | 3-month follow-up mean change (n) |              |               | 6-month follow-up mean change (n) |              |               |
|----------------------------|-----------------------------------|--------------|---------------|-----------------------------------|--------------|---------------|
|                            | Dimension                         | Clinic group | Control group | P-value                           | Clinic group | Control group |
| Physical functioning       | +1.4(73)                          | -1.7(72)     | 0.19          | +2.5(66)                          | -4.7(59)     | 0.04          |
| Social functioning         | +1.6(73)                          | -8.6(72)     | 0.09          | +1.1(66)                          | -7.6(59)     | 0.17          |
| Physical role limitation   | -4.3(72)                          | -1.8(69)     | 0.70          | -5.0(64)                          | -8.3(59)     | 0.69          |
| Emotional role limitation  | +3.2(72)                          | -9.1(69)     | 0.10          | +7.2(64)                          | -16.3(59)    | 0.01          |
| Mental health              | +2.9(73)                          | -0.9(70)     | 0.14          | +4.5(66)                          | -4.0(59)     | 0.02          |
| Energy/vitality            | +7.0(73)                          | -4.5(70)     | <0.001        | +4.8(66)                          | -1.6(59)     | 0.08          |
| Pain                       | +0.7(73)                          | -0.3(72)     | 0.75          | +1.0(66)                          | +1.7(59)     | 0.86          |
| General health perceptions | +1.8(73)                          | -1.0(69)     | 0.29          | +2.2(65)                          | -0.7(57)     | 0.38          |
| SF-6D                      |                                   |              |               |                                   |              |               |
| Health-related utility     |                                   |              |               | +0.024(64)                        | -0.014(59)   | 0.13          |

Change measured by area under the curve. Positive values indicate better perceived health
